# Supplementary material for: Aromatic Thioacetal-Bridged ROS-Responsive Nanoparticles as Novel Gene Delivery Vehicles
Source: MDPI journal article supplement (doi:10.3390/molecules23082061), 2018-08-17
Supplement: s1 [file s1]

## Supplementary Information

### Aromatic thioacetal -Bridged ROS-Responsive

### Nanoparticles as Novel Gene Delivery Vehicles

Guo-Qing Lin, Wen-Jing Yi \*, Qiang Liu, Xue-Jun Yang and Zhi-Gang Zhao \*

College of Chemistry and Environmental Protection Engineering, Southwest Minzu University,  
Chengdu 610041, P.R. China

\*Corresponding authors: Wen-Jing Yi, ywjchem@163.com;

Zhi-Gang Zhao, zzg63129@163.com

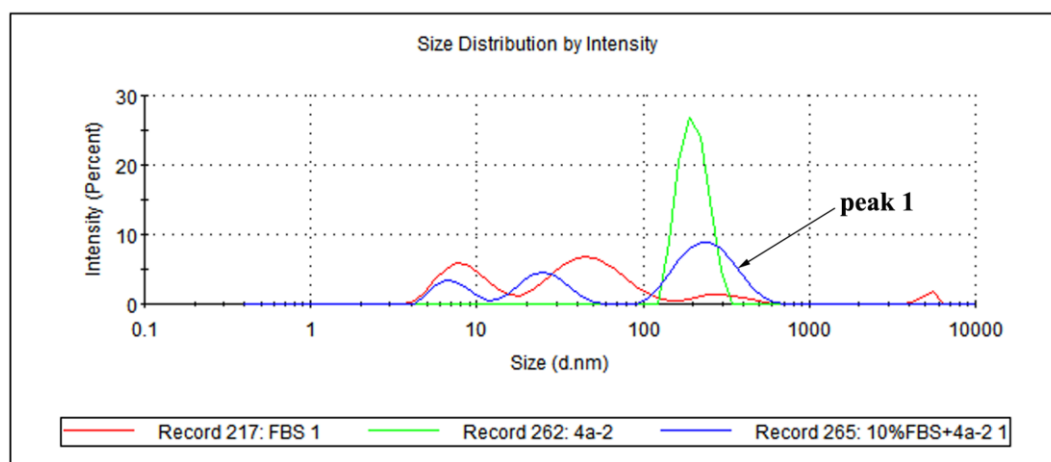

**Fig. S1** The particle diameter obtained by DLS.

Green line: the diameter of **4a**/DNA complexes at w/w ratio of 2 without FBS;

red line: the diameter of 10% FBS;

blue line: the diameter of **4a**/DNA complexes at w/w ratio of 2 in presence of 10% FBS.

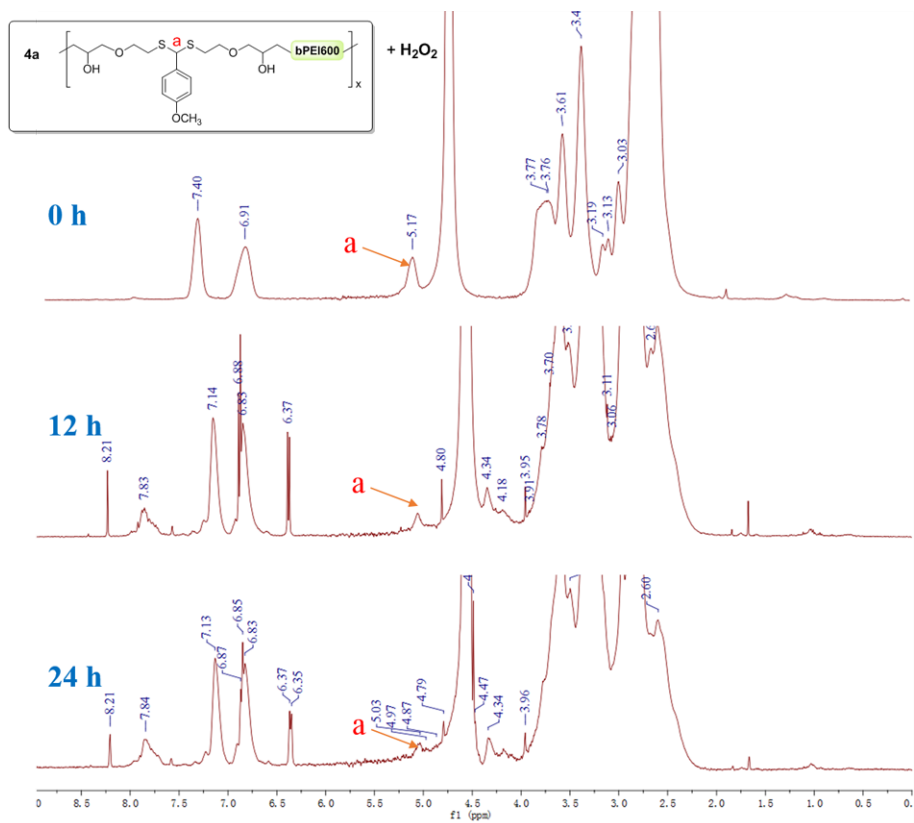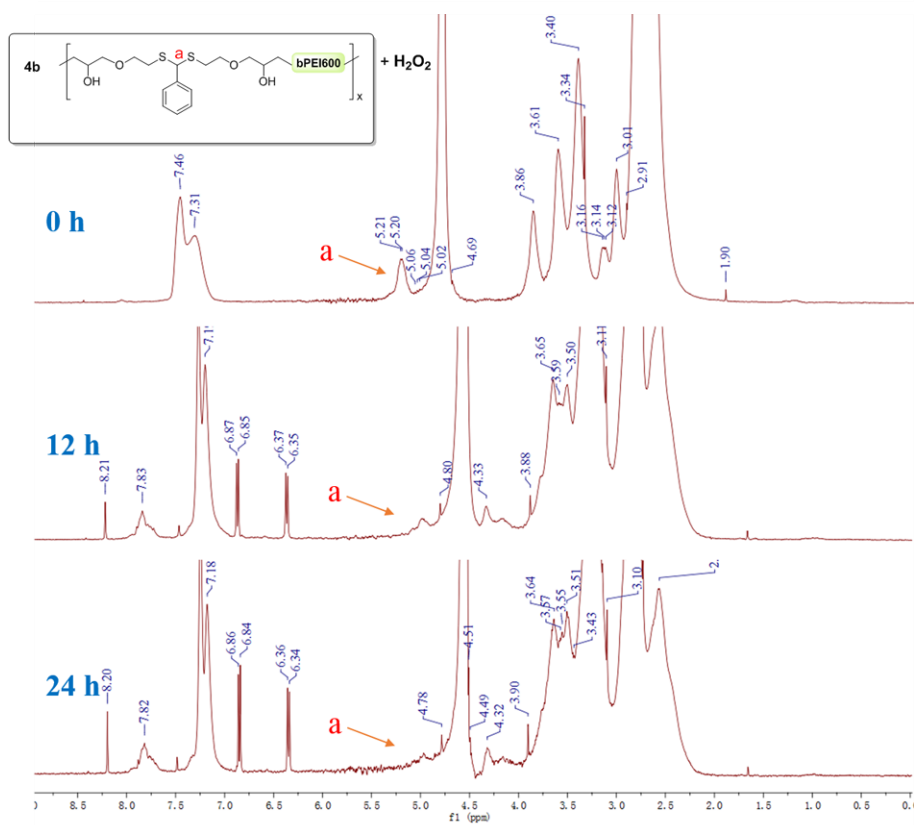

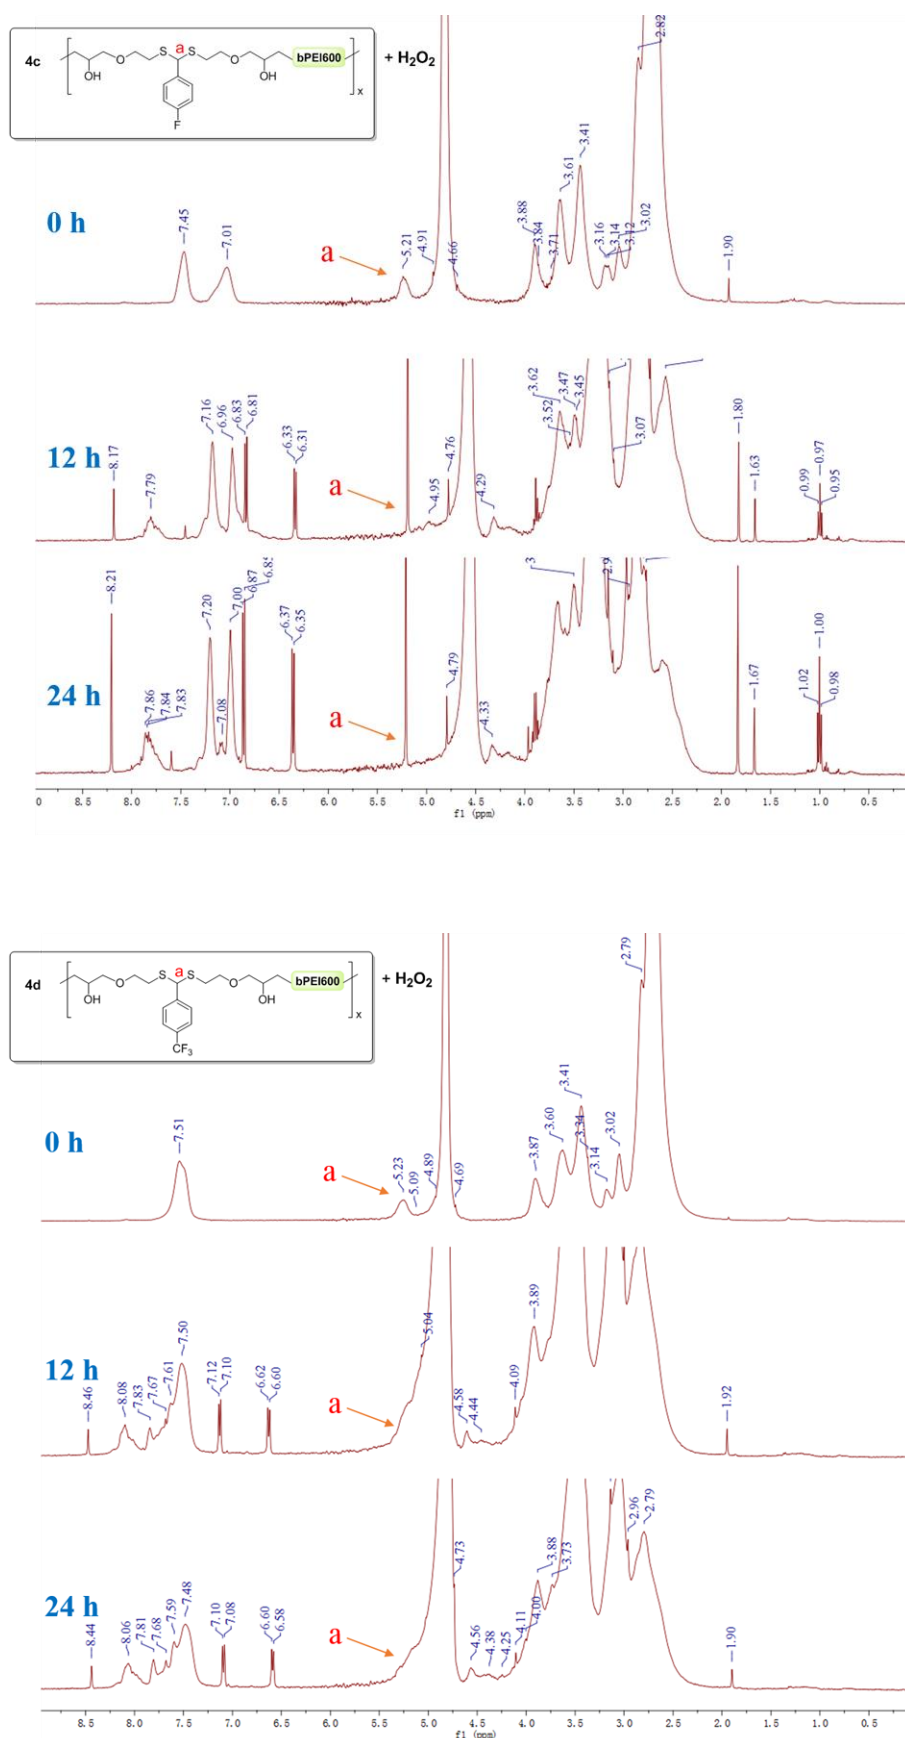

**Fig. S2** Study of polymer **4** decomposition upon treatment with 100 mM H<sub>2</sub>O<sub>2</sub> (simulated ROS conditions) for 0, 12 and 24 h using <sup>1</sup>H-NMR analysis.

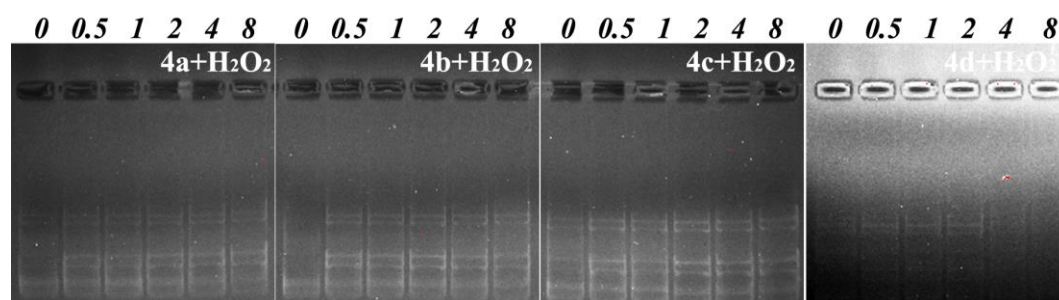

**Fig. S3** Agarose gel electrophoresis of polymer/DNA polyplexes prepared at different w/w ratios after incubation with 100 mM H<sub>2</sub>O<sub>2</sub> for 48 h at 37 °C. In each image, the first lane is the DNA control.

**Table S1** Polymer/DNA ratio in terms of both weight ratio (w/w) and N/P ratio (polymer nitrogen/DNA phosphate) were used.

| polymer        | w/w ratio | 1.4 | 2    | 4     | 6     |
|----------------|-----------|-----|------|-------|-------|
|                | N/P ratio |     |      |       |       |
| <b>4a</b>      |           |     | 8.74 | 17.49 | 26.22 |
| <b>4b</b>      |           |     | 9.02 | 18.04 | 27.06 |
| <b>4c</b>      |           |     | 8.85 | 17.71 | 26.55 |
| <b>4d</b>      |           |     | 8.42 | 16.84 | 25.26 |
| <b>PEI 25K</b> |           | 10  |      |       |       |
| <b>PEI 600</b> |           |     |      | 28.7  |       |

## Spectra

### <sup>19</sup>F-NMR Spectra

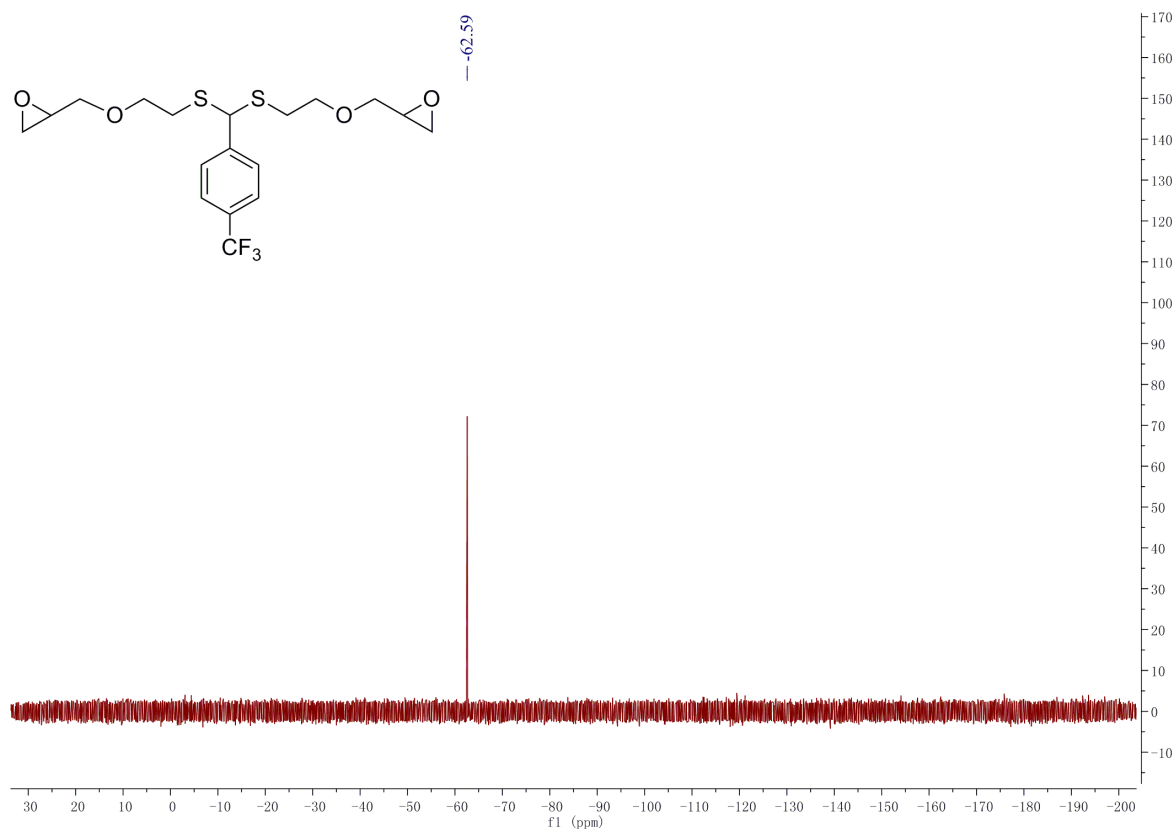

## <sup>1</sup>H-NMR Spectra

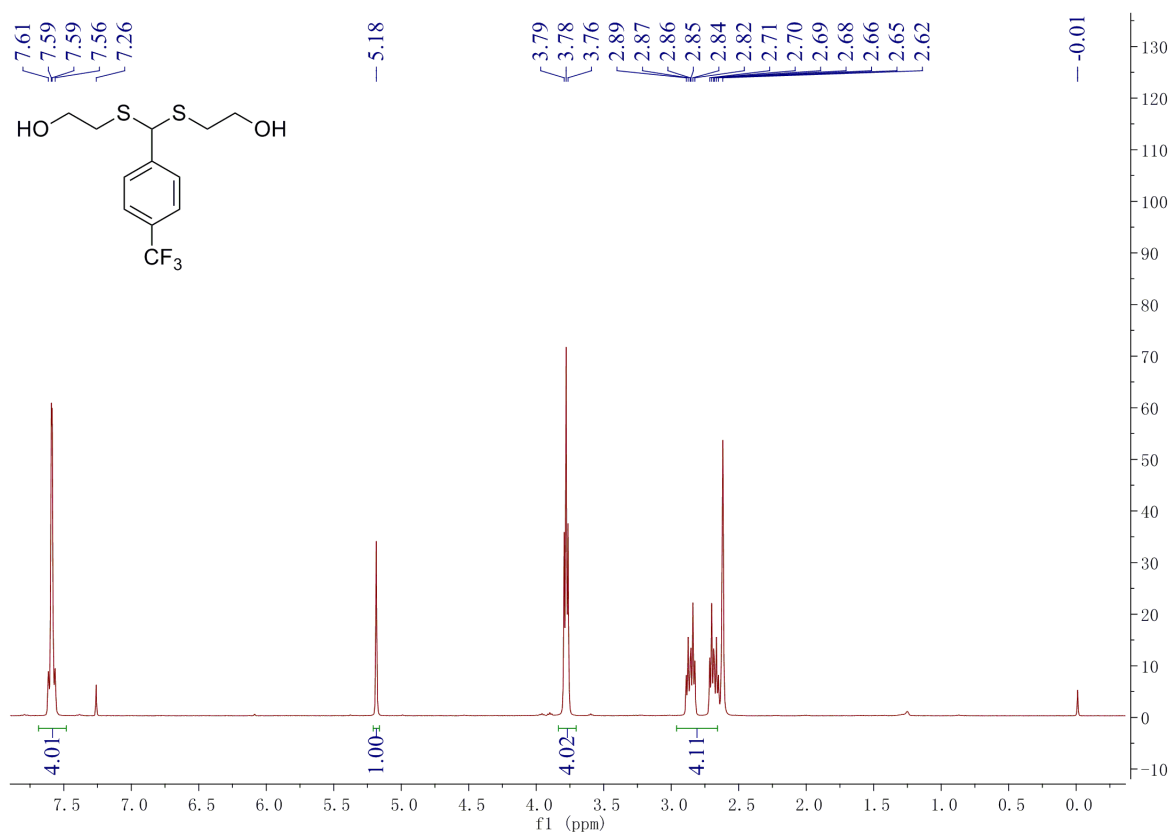

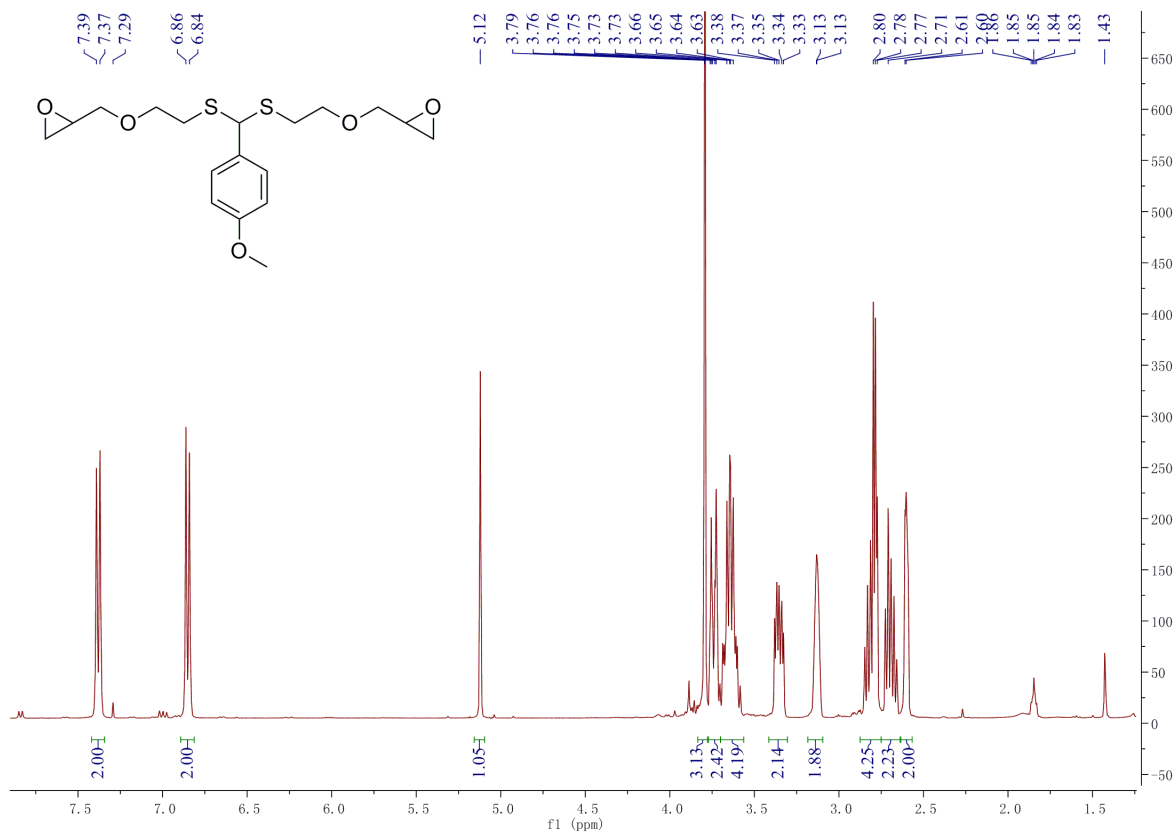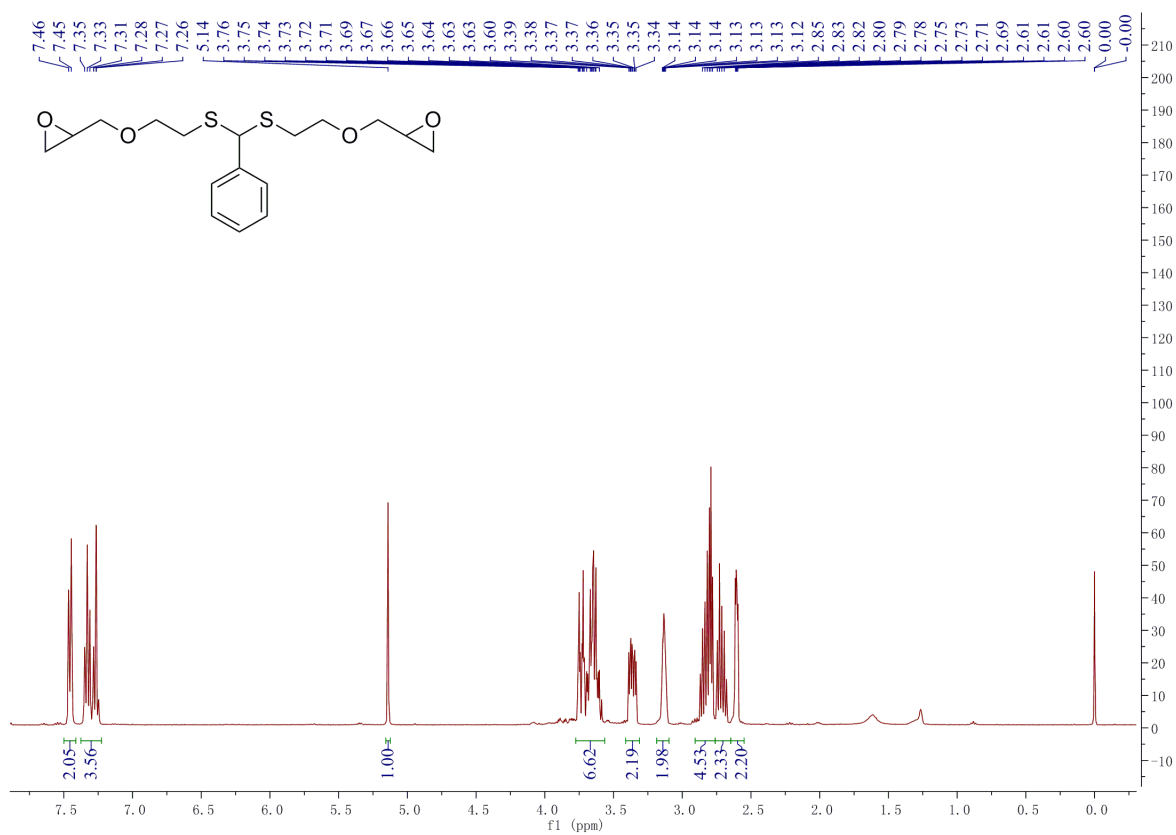

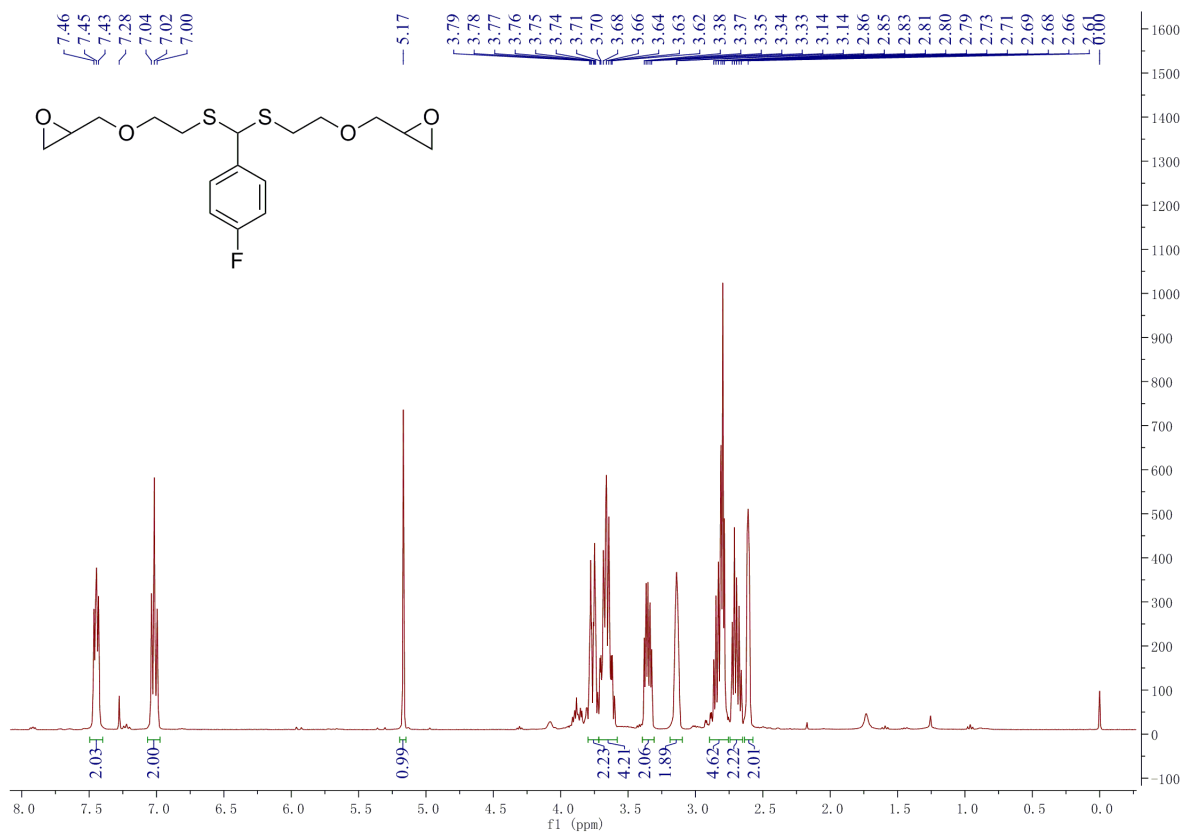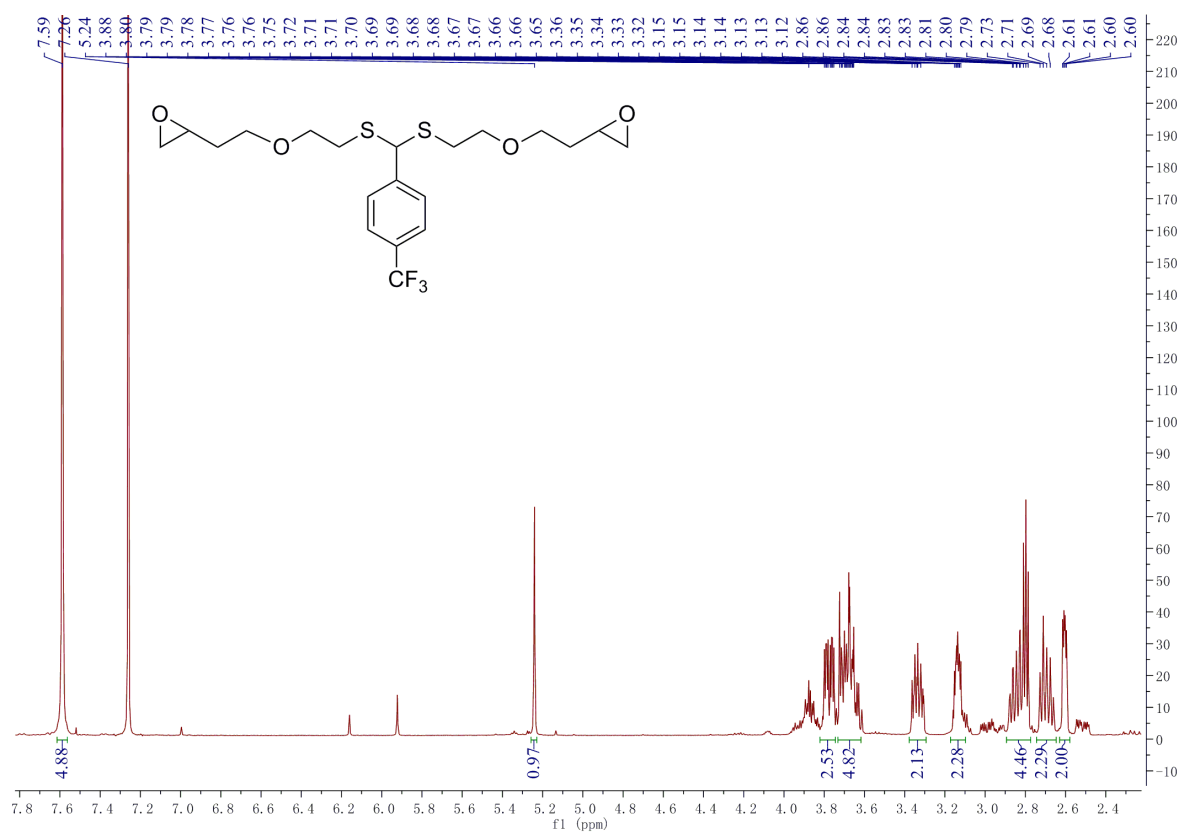

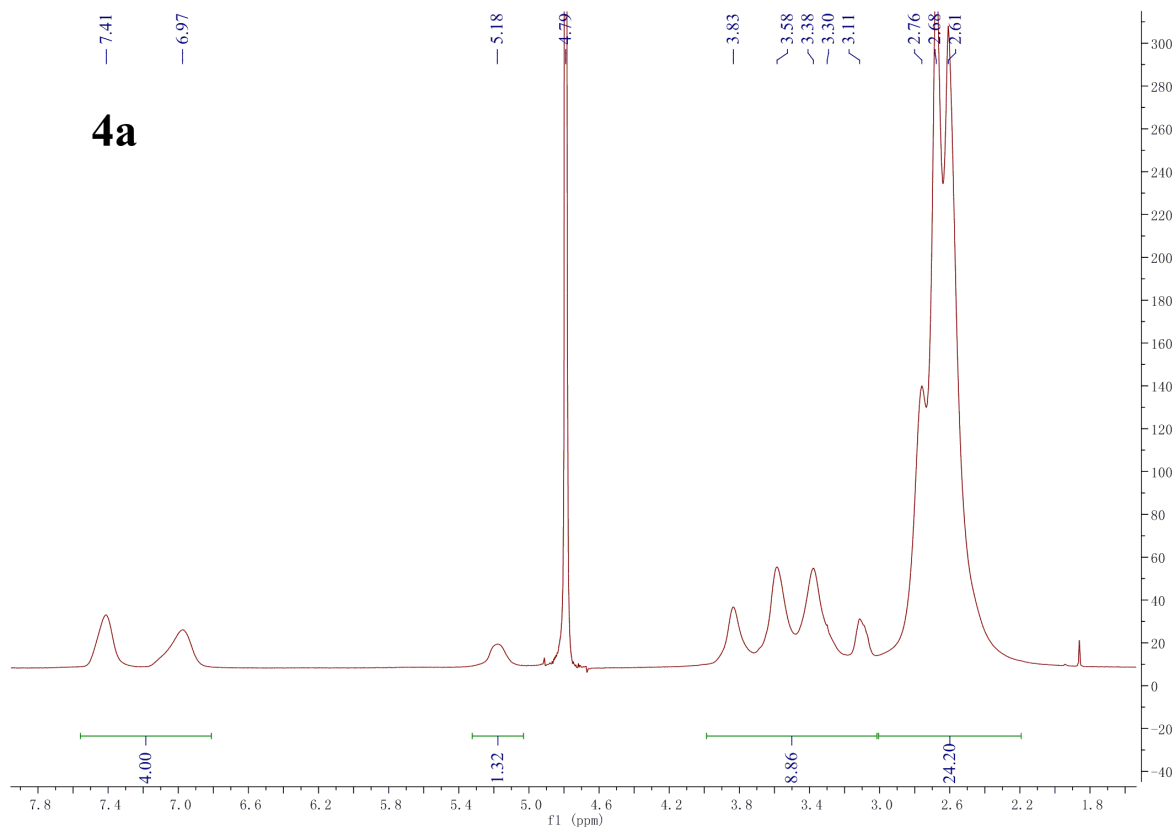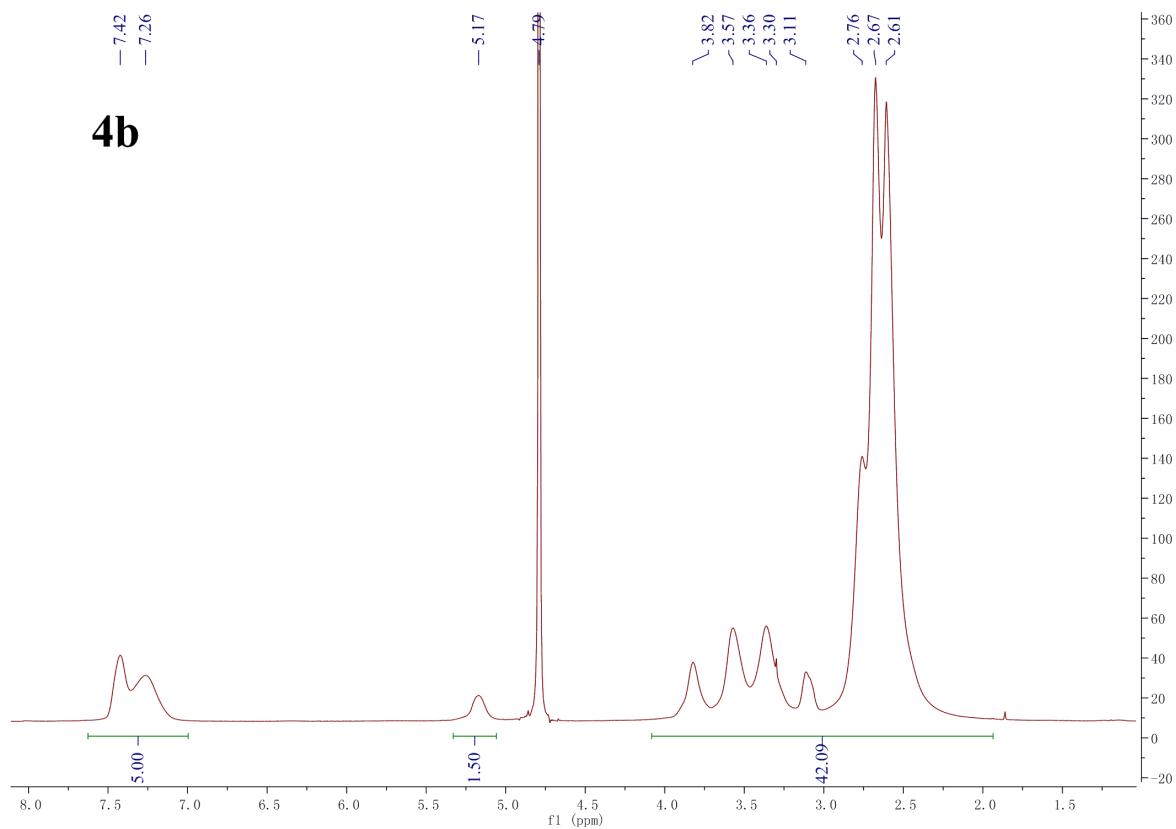



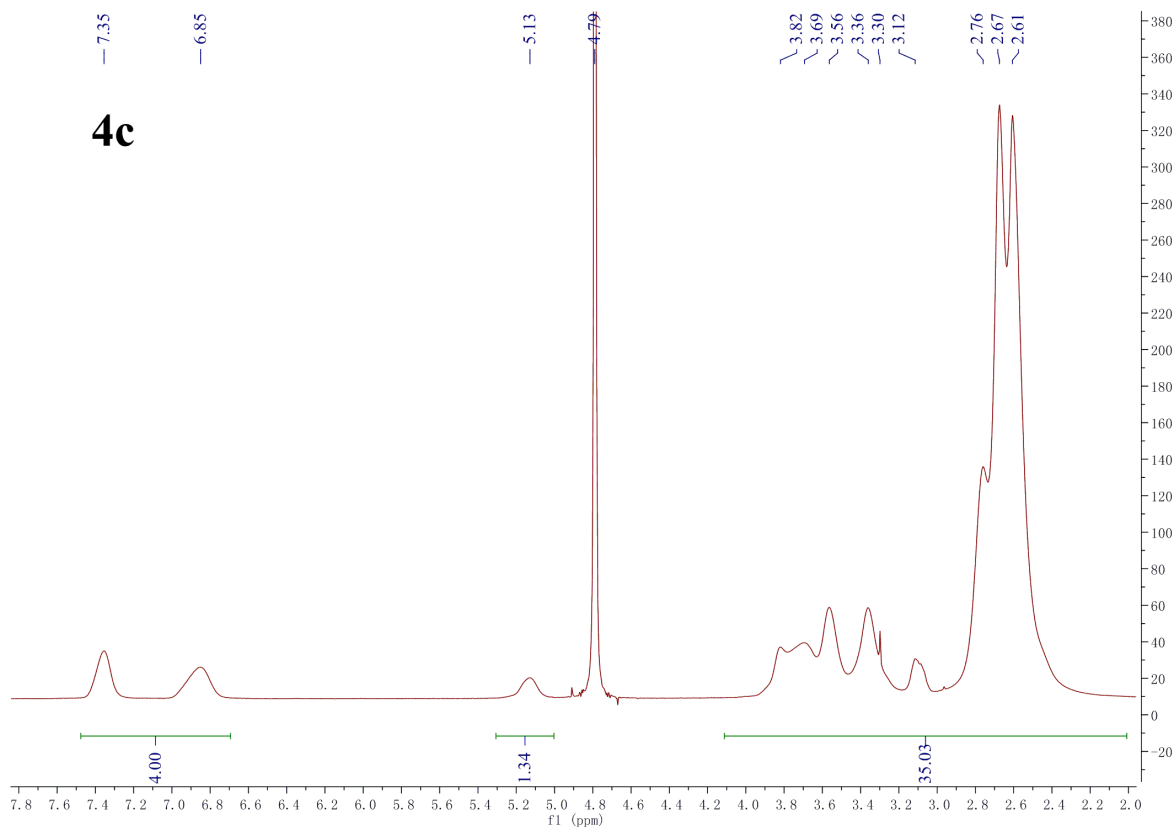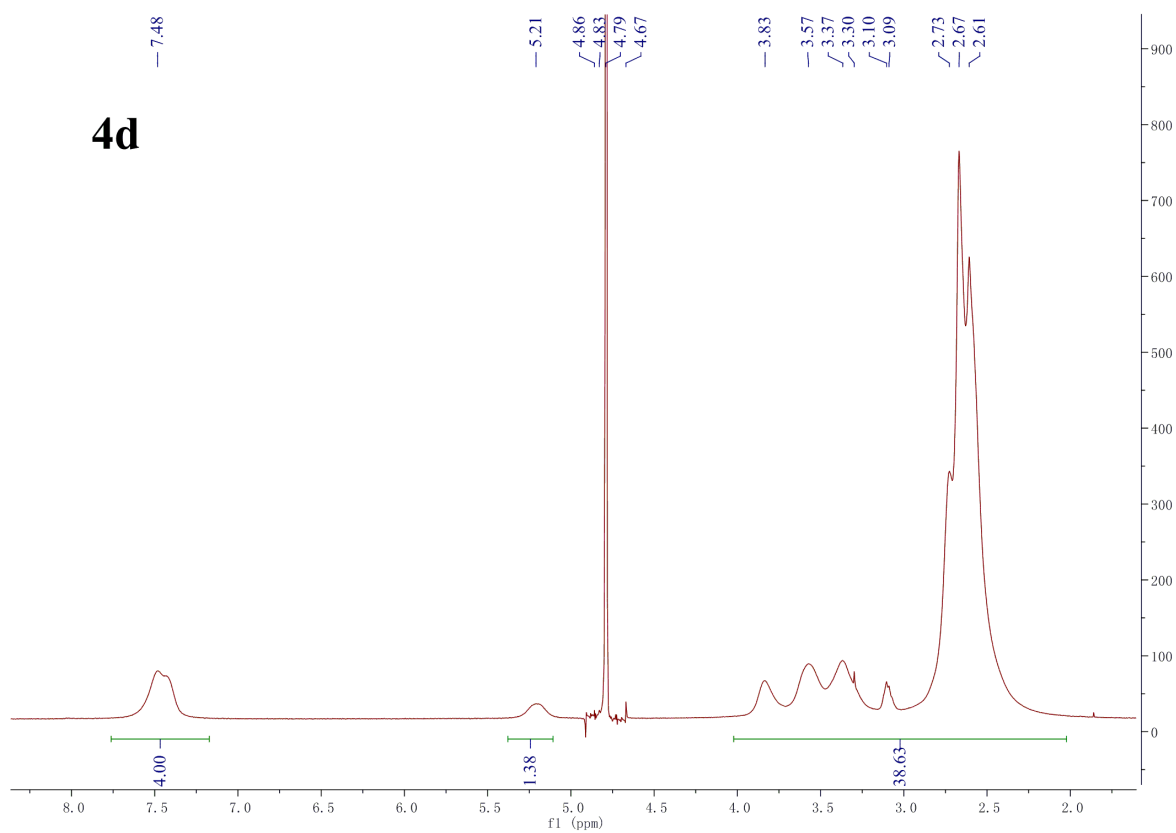

**$^{13}\text{C}$ -NMR Spectra**

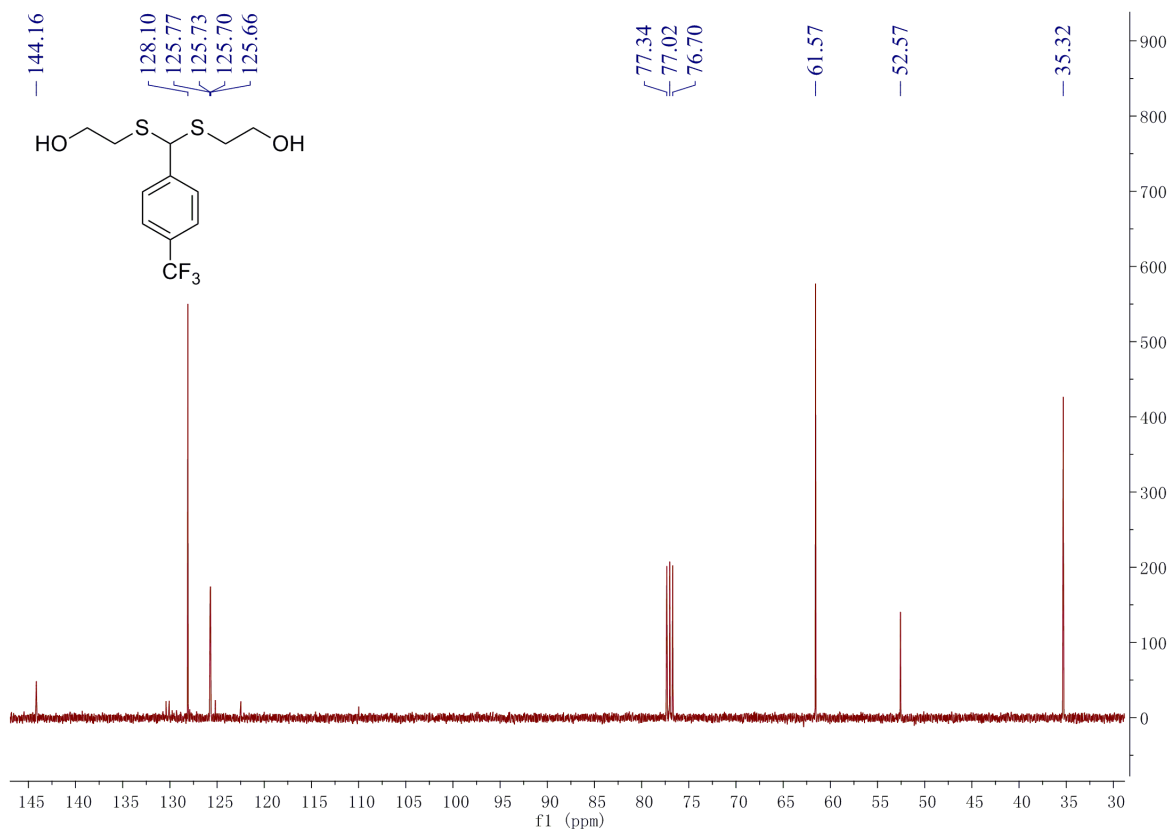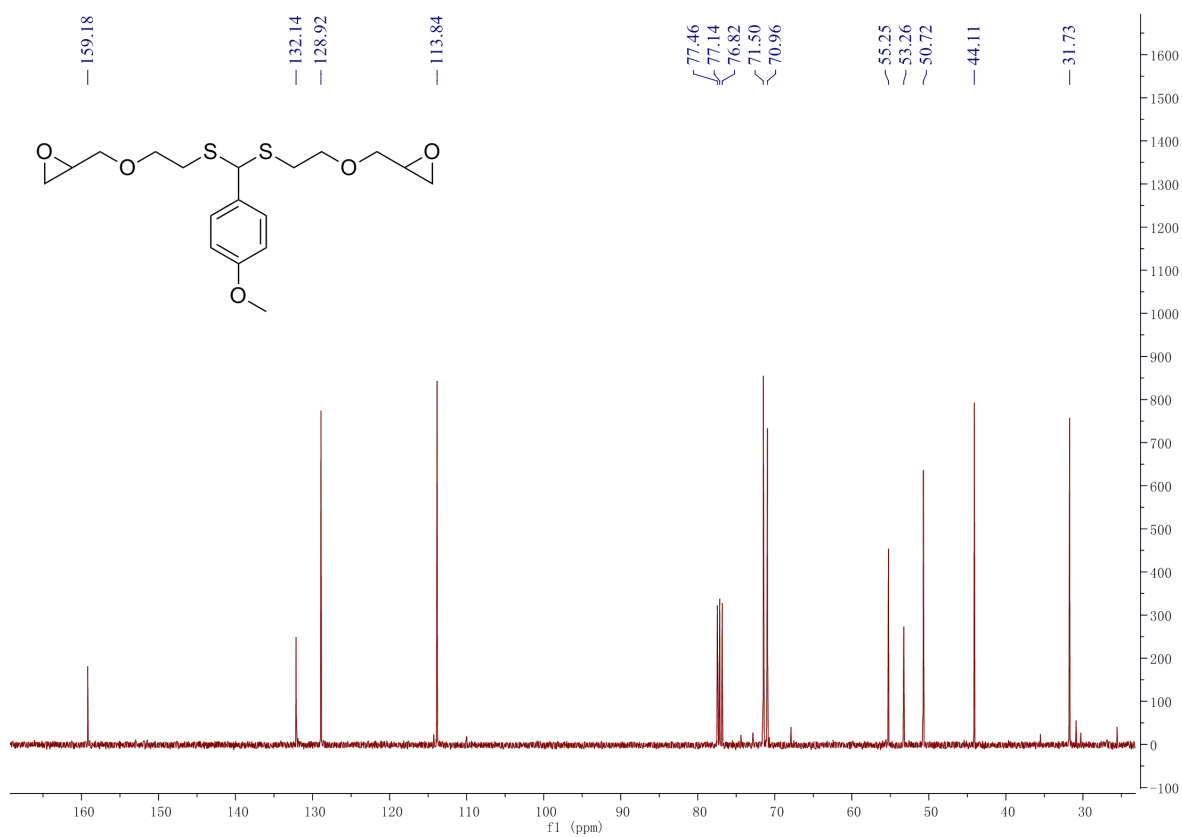

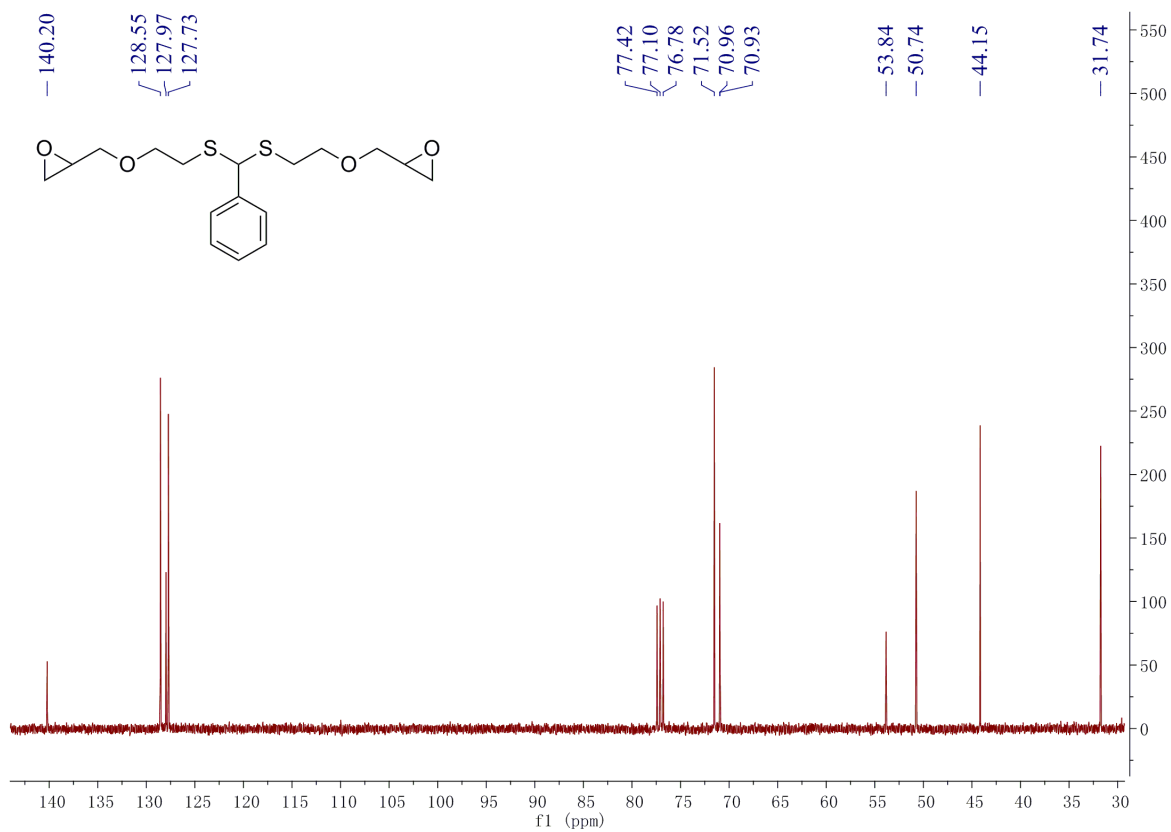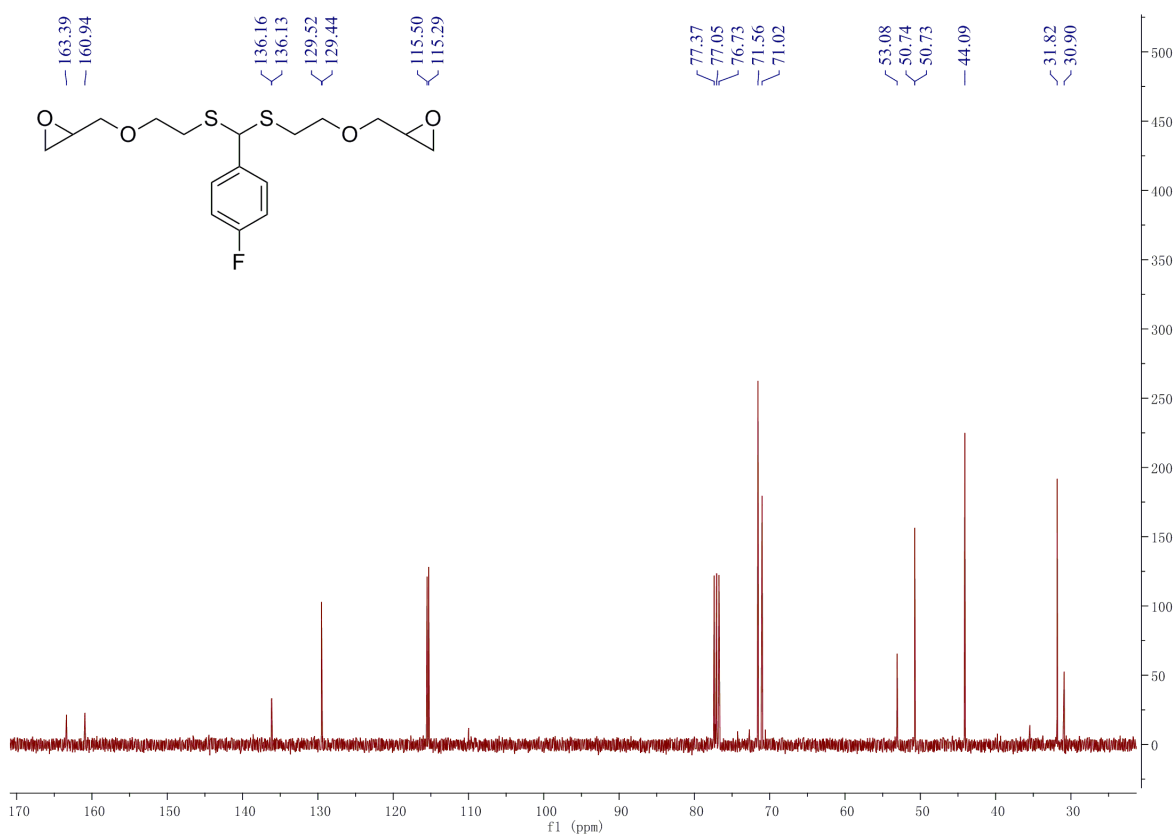

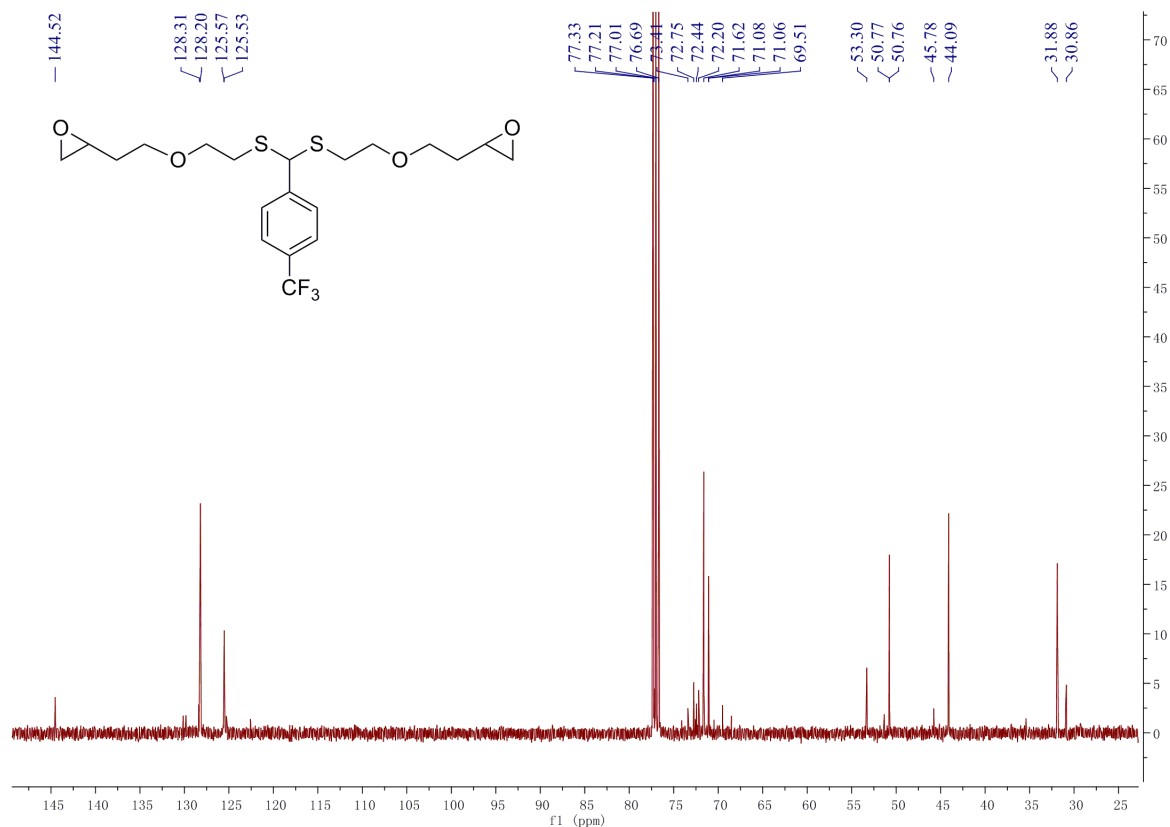

## GPC

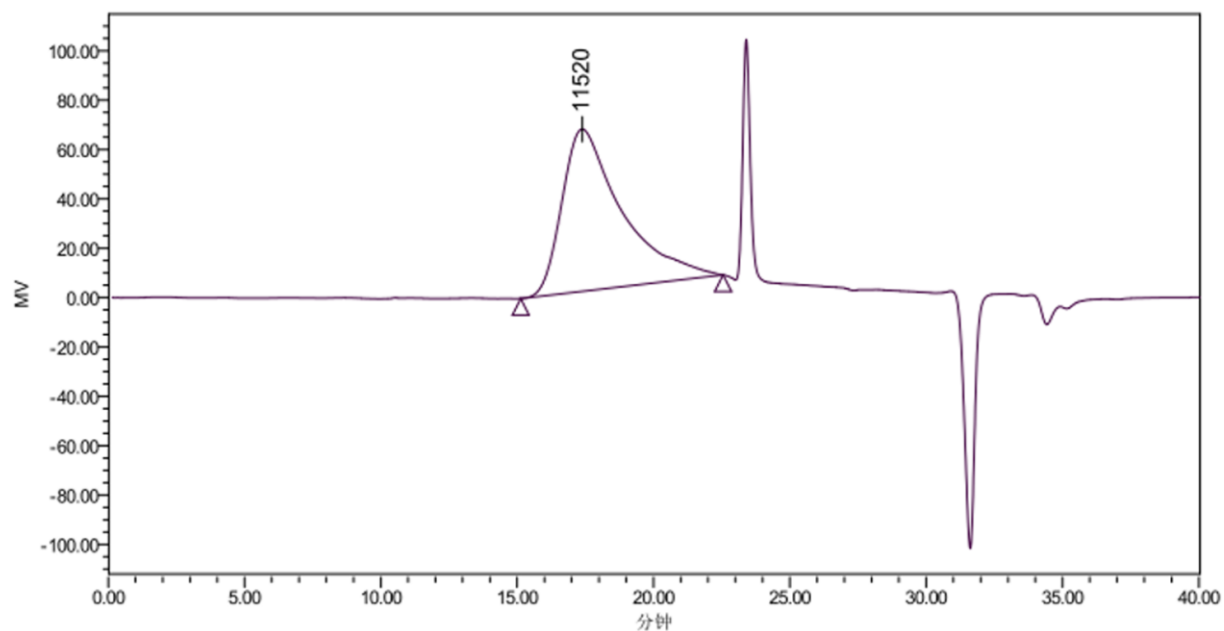

宽分布未知样相对峰表

| 分布名 | Mn<br>(道尔顿) | Mw<br>(道尔顿) | MP    | Mz<br>(道尔顿) | Mz+1<br>(道尔顿) | 多分散性     | Mz/Mw    | Mz+1/Mw  |
|-----|-------------|-------------|-------|-------------|---------------|----------|----------|----------|
| 1   | 5349        | 9871        | 11520 | 14803       | 19572         | 1.845554 | 1.499636 | 1.982787 |

4a

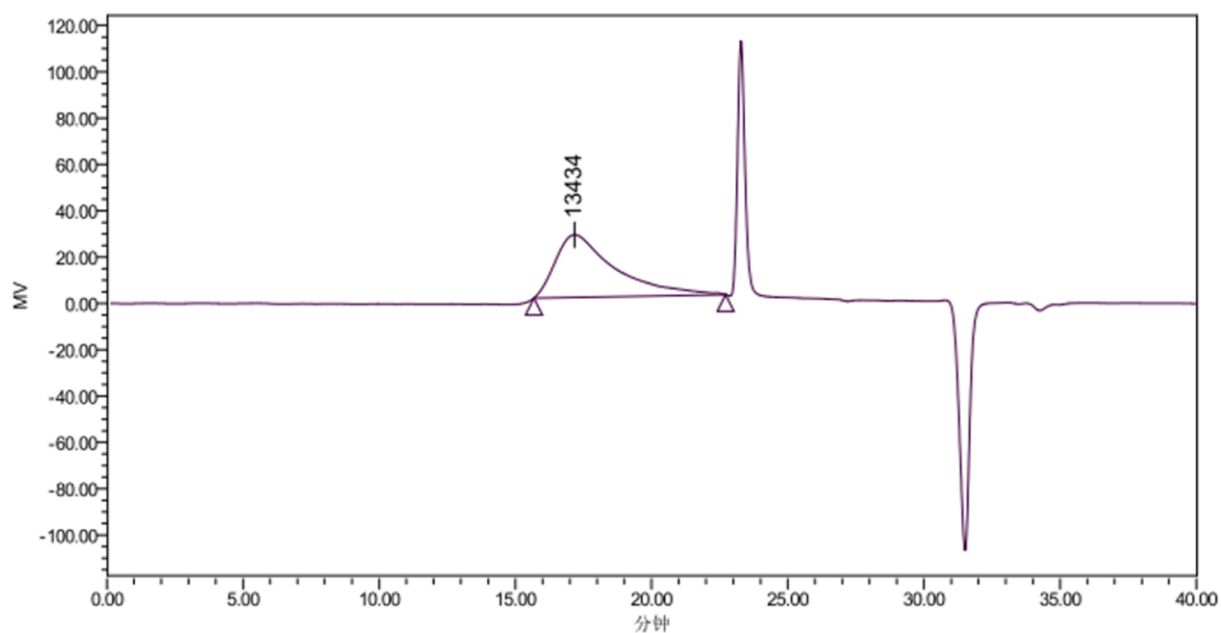

宽分布未知样相对峰表

| 分布名 | Mn<br>(道尔顿) | Mw<br>(道尔顿) | MP    | Mz<br>(道尔顿) | Mz+1<br>(道尔顿) | 多分散性     | Mz/Mw    | Mz+1/Mw  |
|-----|-------------|-------------|-------|-------------|---------------|----------|----------|----------|
| 1   | 5547        | 10916       | 13434 | 16168       | 20475         | 1.968078 | 1.481086 | 1.875709 |

4b

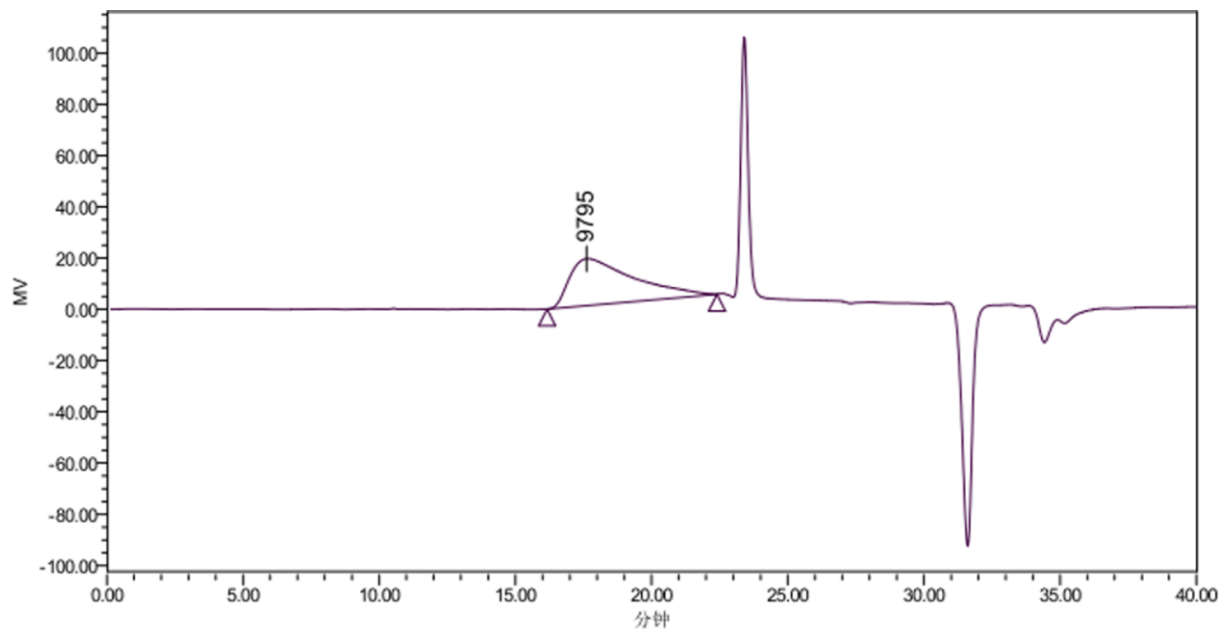

宽分布未知样相对峰表

| 分布名 | Mn<br>(道尔顿) | Mw<br>(道尔顿) | MP   | Mz<br>(道尔顿) | Mz+1<br>(道尔顿) | 多分散性     | Mz/Mw    | Mz+1/Mw  |
|-----|-------------|-------------|------|-------------|---------------|----------|----------|----------|
| 1   | 4199        | 7123        | 9795 | 10114       | 12458         | 1.696495 | 1.419886 | 1.748911 |

4c

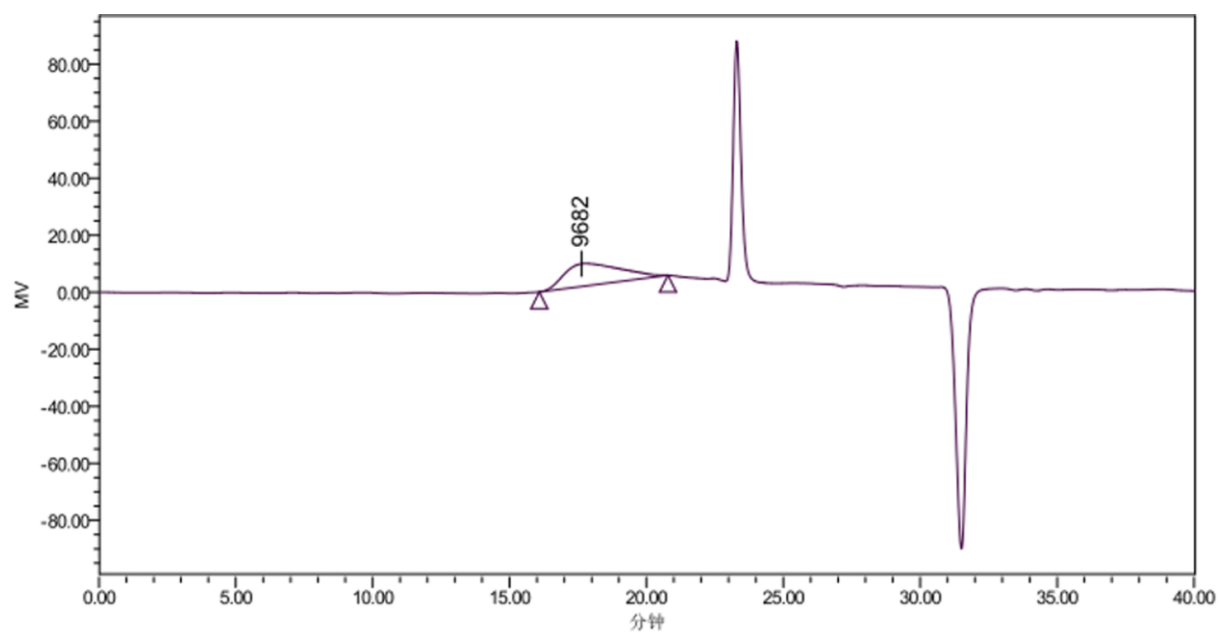

宽分布未知样相对峰表

| 分布名 | Mn<br>(道尔顿) | Mw<br>(道尔顿) | MP   | Mz<br>(道尔顿) | Mz+1<br>(道尔顿) | 多分散性     | Mz/Mw    | Mz+1/Mw  |
|-----|-------------|-------------|------|-------------|---------------|----------|----------|----------|
| 1   | 5879        | 8209        | 9682 | 10781       | 13143         | 1.396357 | 1.313374 | 1.601084 |

4d
